# Supplementary material for: Association between Depressive Symptom Trajectory and Chronic Kidney Disease Progression: Findings from the Chronic Renal Insufficiency Cohort Study
Source: PubMed Central journal article supplement (PMC10278792; doi:10.34067/kid.0000000000000087), 2023-02-23
Supplement: kidney360-4-606-s001.pdf [file kidney360-4-606-s001.pdf]

**Supplemental Table 1:** Characteristics of included and excluded participants

| Variables                                   | Included<br>participants<br>(n=2361) | Excluded<br>participants<br>(n=1578) |
|---------------------------------------------|--------------------------------------|--------------------------------------|
| Age, mean (SD), years                       | 58.3 (10.3)                          | 56.7 (11.9)                          |
| Sex, Female, %                              | 1109 (47.0)                          | 669 (42.4)                           |
| Race, %                                     |                                      |                                      |
| non-Hispanic White                          | 1156 (49.0)                          | 482 (30.5)                           |
| non-Hispanic Black                          | 900 (38.1)                           | 750 (47.5)                           |
| Hispanic                                    | 305 (12.9)                           | 346 (21.9)                           |
| Diabetes, %                                 | 995 (42.1)                           | 913 (57.9)                           |
| Hypertension, %                             | 1975 (83.7)                          | 1416 (89.7)                          |
| Cardiovascular disease, %                   | 700 (29.7)                           | 616 (39.0)                           |
| BDI Score                                   |                                      |                                      |
| Year=0 (baseline)                           |                                      |                                      |
| % Responders                                | 2342 (99.2)                          | 1547 (98.0)                          |
| Mean (SD)                                   | 7.1 (7.1)                            | 9.5 (8.8)                            |
| Year=2                                      |                                      |                                      |
| % Responders                                | 2311 (97.9)                          | 751 (47.6)                           |
| Mean (SD)                                   | 7.0 (7.1)                            | 8.8 (8.3)                            |
| Year=4                                      |                                      |                                      |
| % Responders                                | 2295 (97.2)                          | 236 (15.0)                           |
| Mean (SD)                                   | 7.2 (7.5)                            | 8.6 (9.2)                            |
| Year=6                                      |                                      |                                      |
| % Responders                                | 1825 (77.3)                          | 150 (9.5)                            |
| Mean (SD)                                   | 6.9 (7.0)                            | 8.1 (8.2)                            |
| Year=8                                      |                                      |                                      |
| % Responders                                | 948 (40.2)                           | 68 (4.3)                             |
| Mean (SD)                                   | 6.7 (7.0)                            | 6.8 (6.8)                            |
| eGFR, mean (SD), mL/min/1.73 m <sup>2</sup> |                                      |                                      |
| Year=0 (baseline)                           |                                      |                                      |
| % Responders                                | 2361 (100.0)                         | 1564 (99.1)                          |
| Mean (SD)                                   | 45.6 (14.8)                          | 37.1 (15.3)                          |
| Year=1                                      |                                      |                                      |
| % Responders                                | 2309 (97.8)                          | 1102 (69.8)                          |
| Mean (SD)                                   | 44.1 (15.2)                          | 33.2 (16.4)                          |
| Year=2                                      |                                      |                                      |
| % Responders                                | 2294 (97.2)                          | 735 (46.6)                           |
| Mean (SD)                                   | 43.4 (15.8)                          | 32.7 (17.5)                          |
| Year=3                                      |                                      |                                      |
| % Responders                                | 2245 (95.1)                          | 497 (31.5)                           |
| Mean (SD)                                   | 42.0 (16.4)                          | 32.2 (18.7)                          |
| Year=4                                      |                                      |                                      |
| % Responders                                | 2199 (93.1)                          | 223 (14.1)                           |
| Mean (SD)                                   | 41.7 (17.8)                          | 38.0 (17.5)                          |
| Year=5                                      |                                      |                                      |
| % Responders                                | 2001 (84.8)                          | 192 (12.2)                           |
| Mean (SD)                                   | 42.7 (18.4)                          | 38.8 (18.1)                          |
| Year=6                                      |                                      |                                      |
| % Responders                                | 1833 (77.6)                          | 156 (9.9)                            |

|        |              |             |             |
|--------|--------------|-------------|-------------|
| Year=7 | Mean (SD)    | 43.4 (18.8) | 40.1 (18.5) |
|        | % Responders | 1647 (69.8) | 138 (8.8)   |
|        | Mean (SD)    | 43.9 (18.9) | 40.0 (18.9) |
| Year=8 | % Responders | 1460 (61.8) | 128 (8.1)   |
|        | Mean (SD)    | 44.3 (18.9) | 40.7 (18.7) |

---
